# Supplementary material
Source: publisher figshare collection journal article supplement (https://gsajournals.figshare.com/ndownloader/files/23858486)
Supplement: Supplementary file 1 [file 23858486]

## Sheet: RNAi phenotype quantification
	Wildtype	Mitotic Phenotype
mCherry RNAi (n = 498)	476	22
nebu RNAi #1 (n =180)	161	19
nebu RNAi #2 (n = 303)	267	36

## Sheet: Developmental time measurements
	Time in minutes
	Wildtype					Df/Mb					Mi/Mb
Cycle 11	9.5	10	10			10					8.5	9
Cycle 12	11.5	13.5	11.5	13.5	11.5	11.5	12	12.5			14.5	13.5	13.5	14	11.5
Cycle 13	17	19.5	17	16.5	18.5	21	19	15.5	16.5	17	20	22	23.5	25	20
